# Supplementary material for: Pairwise maximum entropy model explains the role of white matter structure in shaping emergent co-activation states
Source: PubMed Central journal article supplement (PMC7887247; doi:10.1038/s42003-021-01700-6), 2021-02-16
Supplement: 42003_2021_1700_MOESM1_ESM.pdf [file 42003_2021_1700_MOESM1_ESM.pdf]

## Description of Additional Supplementary Files

**File name:** Supplementary Data 1

**Description:** Information about datasets from the IEEG-Portal, <http://www.ieeg.org>

**File name:** Supplementary Data 2

**Description:** Source Data for Figures

Manu\_Fig3\_Panel\_a\_Data

Manu\_Fig3\_Panel\_b\_Data

Manu\_Fig4\_Panel\_a\_SC\_Data

Manu\_Fig4\_Panel\_b\_alpha\_Data

Manu\_Fig4\_Panel\_b\_beta\_Data

Manu\_Fig4\_Panel\_b\_gamma\_Data

Manu\_Fig4\_Panel\_b\_Hgamma\_Data

Manu\_Fig4\_Panel\_b\_theta\_Data

Manu\_Fig4\_Panel\_c\_alpha\_Data

Manu\_Fig4\_Panel\_c\_beta\_Data

Manu\_Fig4\_Panel\_c\_gamma\_Data

Manu\_Fig4\_Panel\_c\_Hgamma\_Data

Manu\_Fig4\_Panel\_c\_theta\_Data

Manu\_Fig6\_Panel\_a\_c\_e\_Data

Manu\_Fig6\_Panel\_b\_d\_f\_Data

Manu\_Fig7\_Panel\_a\_Data

Manu\_Fig7\_Panel\_b\_Data

Manu\_Fig7\_Panel\_c\_Data

Manu\_Fig8\_Panel\_a\_Data

Manu\_Fig8\_Panel\_b\_Data

Manu\_Fig8\_Panel\_c\_Data

Manu\_Fig8\_Panel\_d\_Data
