# Supplementary material for: Pairwise maximum entropy model explains the role of white matter structure in shaping emergent co-activation states
Source: PubMed Central journal article supplement (PMC7887247; doi:10.1038/s42003-021-01700-6), 2021-02-16
Supplement: 42003_2021_1700_MOESM4_ESM.pdf [file 42003_2021_1700_MOESM4_ESM.pdf]

## Reporting Summary

Nature Research wishes to improve the reproducibility of the work that we publish. This form provides structure for consistency and transparency in reporting. For further information on Nature Research policies, see our [Editorial Policies](#) and the [Editorial Policy Checklist](#).

### Statistics

For all statistical analyses, confirm that the following items are present in the figure legend, table legend, main text, or Methods section.

n/a Confirmed

- The exact sample size ( $n$ ) for each experimental group/condition, given as a discrete number and unit of measurement
- A statement on whether measurements were taken from distinct samples or whether the same sample was measured repeatedly
- The statistical test(s) used AND whether they are one- or two-sided  
*Only common tests should be described solely by name; describe more complex techniques in the Methods section.*
- A description of all covariates tested
- A description of any assumptions or corrections, such as tests of normality and adjustment for multiple comparisons
- A full description of the statistical parameters including central tendency (e.g. means) or other basic estimates (e.g. regression coefficient) AND variation (e.g. standard deviation) or associated estimates of uncertainty (e.g. confidence intervals)
- For null hypothesis testing, the test statistic (e.g.  $F$ ,  $t$ ,  $r$ ) with confidence intervals, effect sizes, degrees of freedom and  $P$  value noted  
*Give  $P$  values as exact values whenever suitable.*
- For Bayesian analysis, information on the choice of priors and Markov chain Monte Carlo settings
- For hierarchical and complex designs, identification of the appropriate level for tests and full reporting of outcomes
- Estimates of effect sizes (e.g. Cohen's  $d$ , Pearson's  $r$ ), indicating how they were calculated

*Our web collection on [statistics for biologists](#) contains articles on many of the points above.*

### Software and code

Policy information about [availability of computer code](#)

Data collection

The data examined in this paper was primarily collected for clinical purposes. The clinical recording software for Penn Medicine is Natus Neuroworks XLTEK. Data is collected from the clinical servers using Natus platform. The data was then converted from Natus proprietary file format to mef2 format using a converter, which is protected under non-disclosure agreement between CNT and Natus. The converted files were then uploaded to iEEG-portal (<http://www.iEEG.org>). For more details regarding the iEEG Portal see 10.1109/NER.2013.6696201

Data analysis

For data analysis, we used MATLAB 2019a and 2014b. We provide the costume codes for calculating the geometric structural connectivity null models in [https://github.com/aashourv/iEEG\\_MEM](https://github.com/aashourv/iEEG_MEM).

For manuscripts utilizing custom algorithms or software that are central to the research but not yet described in published literature, software must be made available to editors and reviewers. We strongly encourage code deposition in a community repository (e.g. GitHub). See the Nature Research [guidelines for submitting code & software](#) for further information.

### Data

Policy information about [availability of data](#)

All manuscripts must include a [data availability statement](#). This statement should provide the following information, where applicable:

- Accession codes, unique identifiers, or web links for publicly available datasets
- A list of figures that have associated raw data
- A description of any restrictions on data availability

All inter-ictal iEEG data are available from the International Epilepsy Electrophysiology Portal (iEEG-Portal, <http://www.ieeg.org>). Information about datasets used in this paper are listed in Supplementary Table 1.

## Field-specific reporting

Please select the one below that is the best fit for your research. If you are not sure, read the appropriate sections before making your selection.

Life sciences  Behavioural & social sciences  Ecological, evolutionary & environmental sciences

For a reference copy of the document with all sections, see [nature.com/documents/nr-reporting-summary-flat.pdf](https://www.nature.com/documents/nr-reporting-summary-flat.pdf)

## Life sciences study design

All studies must disclose on these points even when the disclosure is negative.

|                 |                                                                                                                                                                                                                                                                                                                                                                                                                         |
|-----------------|-------------------------------------------------------------------------------------------------------------------------------------------------------------------------------------------------------------------------------------------------------------------------------------------------------------------------------------------------------------------------------------------------------------------------|
| Sample size     | We analyzed an average of more than 14 hours (per patient) of inter-ictal iEEG recording of five patients. We demonstrate that the pairwise correlation between iEEG electrodes stabilize after several hours (>12 hours) of recording, which suggest that the length of dataset is sufficient for capturing the fundamental structure essential to the collective behavior in the recorded regions using pairwise MEM. |
| Data exclusions | We downloaded 24 one-hour segments of inter-ictal iEEG recordings from the online International Epilepsy Electrophysiology Portal (iEEG portal, <a href="http://www.ieeg.org">http://www.ieeg.org</a> ) for each patient and after visual inspection removed all one-hour segments with artifacts.                                                                                                                      |
| Replication     | We were able to replicate the pairwise MEM's goodness-of-fit results across all five patients. Similarly we found significant correlation between the pairwise MEM's interaction weights and the direct anatomical connectivity between recorded brain regions.                                                                                                                                                         |
| Randomization   | We did not group the subjects in anyway. We provided subject-specific analysis and null models to verify our findings. Therefore, randomization was not relevant.                                                                                                                                                                                                                                                       |
| Blinding        | Since we are not grouping the subjects as mentioned above, blinding was not relevant.                                                                                                                                                                                                                                                                                                                                   |

## Reporting for specific materials, systems and methods

We require information from authors about some types of materials, experimental systems and methods used in many studies. Here, indicate whether each material, system or method listed is relevant to your study. If you are not sure if a list item applies to your research, read the appropriate section before selecting a response.

### Materials & experimental systems

|                                     |                                                                 |
|-------------------------------------|-----------------------------------------------------------------|
| n/a                                 | Included in the study                                           |
| <input checked="" type="checkbox"/> | <input type="checkbox"/> Antibodies                             |
| <input checked="" type="checkbox"/> | <input type="checkbox"/> Eukaryotic cell lines                  |
| <input checked="" type="checkbox"/> | <input type="checkbox"/> Palaeontology and archaeology          |
| <input checked="" type="checkbox"/> | <input type="checkbox"/> Animals and other organisms            |
| <input type="checkbox"/>            | <input checked="" type="checkbox"/> Human research participants |
| <input checked="" type="checkbox"/> | <input type="checkbox"/> Clinical data                          |
| <input checked="" type="checkbox"/> | <input type="checkbox"/> Dual use research of concern           |

### Methods

|                                     |                                                            |
|-------------------------------------|------------------------------------------------------------|
| n/a                                 | Included in the study                                      |
| <input checked="" type="checkbox"/> | <input type="checkbox"/> ChIP-seq                          |
| <input checked="" type="checkbox"/> | <input type="checkbox"/> Flow cytometry                    |
| <input type="checkbox"/>            | <input checked="" type="checkbox"/> MRI-based neuroimaging |

## Human research participants

Policy information about [studies involving human research participants](#)

|                            |                                                                                                                                                                                                                                                                                                                                                                                                                                                               |
|----------------------------|---------------------------------------------------------------------------------------------------------------------------------------------------------------------------------------------------------------------------------------------------------------------------------------------------------------------------------------------------------------------------------------------------------------------------------------------------------------|
| Population characteristics | Five patients (mean age 41.6, standard deviation 4.8; 3 female) undergoing surgical treatment for medically refractory epilepsy at the Hospital of the University of Pennsylvania underwent implantation of subdural electrodes for localization of the seizure onset zone. All patients had unilateral temporal lobe epilepsy, determined by comprehensive clinical evaluation and validated by seizure free one-year outcomes following temporal lobectomy. |
| Recruitment                | Participants are recruited from patients undergoing surgical treatment. All patients provided written informed consent prior to participating.                                                                                                                                                                                                                                                                                                                |
| Ethics oversight           | This study was approved by the Institutional Review Board of the University of Pennsylvania.                                                                                                                                                                                                                                                                                                                                                                  |

Note that full information on the approval of the study protocol must also be provided in the manuscript.

## Magnetic resonance imaging

### Experimental design

|             |                                                                   |
|-------------|-------------------------------------------------------------------|
| Design type | We examined resting inter-ictal iEEG recording from all patients. |
|-------------|-------------------------------------------------------------------|

Design specifications

Behavioral performance measures

## Acquisition

Imaging type(s)

Field strength

Sequence & imaging parameters

Area of acquisition

Diffusion MRI  Used  Not used

Parameters

## Preprocessing

Preprocessing software

Normalization

Normalization template

Noise and artifact removal

Volume censoring

## Statistical modeling & inference

Model type and settings

Effect(s) tested

Specify type of analysis:  Whole brain  ROI-based  Both

Anatomical location(s)

Statistic type for inference (See [Eklund et al. 2016](#))

Correction

## Models & analysis

n/a  Involved in the study

Functional and/or effective connectivity

Graph analysis

Multivariate modeling or predictive analysis

Functional and/or effective connectivity

Pairwise MEM, Pearson correlation, Partial correlation, Phase-locking value (PLV), Weighted phase-locking index (WPLI).
